# Supplementary material
Source: HighWire-hosted journal article supplement (https://www.annfammed.org/highwire/filestream/8336/field_highwire_adjunct_files/0/Rittenhouse_Supp_App_1.pdf)
Supplement: Rittenhouse_Supp_App_1.pdf [file Rittenhouse_Supp_App_1.pdf]

**Online Supplementary Material**

Rittenhouse DR, Schmidt L, Wu K, Wiley J. Contrasting trajectories of change in primary care clinics: lessons from New Orleans safety net. *Ann Fam Med.* 2013;11(Suppl 1):S60-S67.

[http://www.annfammed.org/content/11/Suppl\\_1/S60](http://www.annfammed.org/content/11/Suppl_1/S60)

**Supplemental Appendix 1. Chronology and Details of Major Events**

| Event                                                                                                                                                                                                                                           | Details                                                                                                                                                                                                                                                                                                                                                                                                                                                                                      |
|-------------------------------------------------------------------------------------------------------------------------------------------------------------------------------------------------------------------------------------------------|----------------------------------------------------------------------------------------------------------------------------------------------------------------------------------------------------------------------------------------------------------------------------------------------------------------------------------------------------------------------------------------------------------------------------------------------------------------------------------------------|
| August 2005, Hurricane Katrina                                                                                                                                                                                                                  | The health care infrastructure of New Orleans, fragmented and inefficient before the hurricane, was severely damaged. Many clinic sites were destroyed, especially safety net clinics serving poor residents (just before the hurricane, approximately 28% of the city's residents lived below the poverty line). Charity Hospital, whose emergency department had provided services to New Orleans uninsured for many decades, was permanently closed.                                      |
| September 2007, PCASG                                                                                                                                                                                                                           | The US Department of Health and Human Services provided \$100 million to fund delivery of health care to the poor. Over a 3-year period, this grant, which was administered through a partnership between the State of Louisiana and the LPHI, provided funds to restore and expand safety net services in greater New Orleans.                                                                                                                                                              |
| Adoption of the PCMH model                                                                                                                                                                                                                      | LPHI explicitly adopted the PCMH model as a framework for providing performance payment to PCASG grantees, including primary care practices, dental sites, and behavioral health clinics. There were 68 sites in June 2008, 93 sites in December 2009, and 89 in June 2010. The 39 nonprofit safety net primary care clinics funded under PCASG were promised a financial bonus if they chose to implement PCMH processes and got PCMH recognition from the NCQA in December 2009 or before. |
| May 2010, Beacon Community Grant awarded to LPHI by the Office of the National Coordinator for Health Information Technology                                                                                                                    | This grant is intended to support the development of a health information network to link primary care sites and hospitals in New Orleans.                                                                                                                                                                                                                                                                                                                                                   |
| October 2010, Medicaid section 1115 Demonstration project approved                                                                                                                                                                              | This waiver created the GNOCHC to provide primary and behavioral health care services to low-income uninsured residents of Jefferson, Orleans, Plaquemines, and St Bernard Parishes. To participate in the program, clinicians must be PCASG awardees.                                                                                                                                                                                                                                       |
| GNOCHC = Greater New Orleans Community Health Connection; LPHI = Louisiana Public Health Institute; NCQA = National Committee for Quality Assurance; PCASG = Primary Care Access and Stabilization Grant; PCMH = patient-centered medical home. |                                                                                                                                                                                                                                                                                                                                                                                                                                                                                              |
